# Supplementary material for: The Toxicokinetics, Excretion Patterns, and Milk Transmission of Ochratoxin A in Lactating Sows
Source: MDPI journal article supplement (doi:10.3390/toxins16030128), 2024-03-01
Supplement: s1 [file s1]

**Table S1. Toxicokinetic parameters following oral and intravenous administration in various animal species.**

| Species         | Route* | BW(kg)    | Dose(mg/kg) | T <sub>max</sub> (h) | C <sub>max</sub> (µg/mL) | T <sub>1/2</sub> Elim(h) | V <sub>d</sub> (mL/kg) | CL(mL/kg) | Reference                   |
|-----------------|--------|-----------|-------------|----------------------|--------------------------|--------------------------|------------------------|-----------|-----------------------------|
| Male Wistar rat | po     | 0.25-0.30 | 0.05        | —                    | 0.39                     | 120                      | 160                    | 0.91      | Hagelberg et al. (1989)[24] |
| Mouse           | po     | 0.02      | 0.05        | —                    | 0.37                     | 39                       | 340                    | 6.1       | Hagelberg et al. (1989)[24] |
| Fish            | po     | 1.00      | 0.05        | —                    | 0.014                    | 0.68                     | 57                     | 58        | Hagelberg et al. (1989)[24] |
| Quail           | po     | 0.16      | 0.05        |                      | 0.26                     | 6.7                      | 550                    | 57        | Hagelberg et al. (1989)[24] |
| Broiler chicken | po     | 1.27      | 0.25        | 1.43-4.63            | 0.05-0.08                | 8.2-14.11                | 270                    | 710-770   | Devreese et al. (2018)[25]  |
| Leghorn chicken | po     | 1.84      | 2.0         | 0.33                 | 0.78                     | 4.15                     | 2160                   | —         | Galtier et al.(1981)[18]    |
| Laying hen      | po     | 2.05      | 0.25        | 0.75-1.88            | 0.05-0.06                | 17.3-21.15               | 230                    | 890-1030  | Devreese et al. (2018)[25]  |
| Turkey          | po     | 1.71      | 0.25        | 0.75-0.81            | 0.18-0.20                | 9.85-15.5                | 180                    | 330-390   | Devreese et al. (2018)[25]  |
| Muscovy duck    | po     | 2.68      | 0.25        | 0.31                 | 0.04-0.05                | 35.14-39.02              | 760                    | 430-610   | Devreese et al. (2018)[25]  |
| Rabbit          | po     | 2-3       | 2.0         | 1                    | 2.13                     | 8.25                     | 453                    | —         | Galtier et al.(1981)[18]    |
| Rhesus monkey   | po     | 5.00      | 0.05        | —                    | 0.50                     | 510                      | 130                    | 0.18      | Hagelberg et al.(1989)[24]  |
| Donkey          | po     | 123.60    | 2.50        | 12                   | 10.34                    | 24.52                    | 150                    | 4.10      | Kang et al. (2023)[22]      |
| Growing pig     | po     | 35        | 0.50        | 10                   | 1.74                     | 88.80                    | 42.9                   | —         | Galtier et al.(1981)[18]    |
| Lactating sow   | po     | 186.25    | 0.50        | 9                    | 0.92                     | 78.47                    | 160                    | 1.40      | This study                  |
| Mouse           | iv     | 0.02      | 0.05        | —                    | 0.37                     | 48                       | 420                    | 6.1       | Hagelberg et al. (1989)[24] |
| Male Wistar rat | iv     | 0.25-0.30 | 0.05        | —                    | 2.1                      | 170                      | 230                    | 0.92      | Hagelberg et al. (1989)[24] |
| Rat             | iv     | 0.30      | 0.33        | —                    | 2.00                     | 103                      | —                      | 3.11      | Li et al. (1997)[19]        |
| Fish            | iv     | 1.00      | 0.05        | —                    | 0.20                     | 8.3                      | 690                    | 57        | Hagelberg et al. (1989)[24] |
| Quail           | iv     | 0.16      | 0.05        | —                    | 0.59                     | 12                       | 1500                   | 86        | Hagelberg et al. (1989)[24] |
| Broiler chicken | iv     | 1.27      | 0.25        | —                    | 0.91-1.20                | 22.2-23.95               | 270                    | 610-740   | Devreese et al. (2018)[25]  |
| Leghorn chicken | iv     | 1.84      | 2.0         | —                    | —                        | 3.00                     | —                      | —         | Galtier et al.(1981)[18]    |
| Laying hen      | iv     | 2.05      | 0.25        | —                    | 1.10-1.44                | 12.15-14.21              | 230                    | 820-980   | Devreese et al. (2018)[25]  |
| Turkey          | iv     | 1.71      | 0.25        | —                    | 1.43-1.48                | 11.28-18.19              | 180                    | 290-380   | Devreese et al. (2018)[25]  |

|               |    |      |             |   |           |             |     |         |                            |
|---------------|----|------|-------------|---|-----------|-------------|-----|---------|----------------------------|
| Muscovy duck  | iv | 2.68 | 0.25        | — | 0.31-0.66 | 16.76-17.04 | 760 | 710-740 | Devreese et al. (2018)[25] |
| Rabbit        | iv | 2-3  | 2.0         | — | —         | 10.8        | —   | —       | Galtier et al.(1981)[18]   |
| Vervet monkey | iv | 2.40 | 0.8,1.5,2.0 | 2 | 26.50     | 484         | 118 | 0.22    | Stander et al.(2001)[20]   |
| Rhesus monkey | iv | 5.00 | 0.05        | — | 0.98      | 840         | 200 | 0.17    | Hagelberg et al.(1989)[24] |
| Growing pig   | iv | 35   | 0.50        | — | —         | 84.5        | —   | —       | Galtier et al.(1981)[18]   |

\*Administration route: po refers to oral administration , iv refers to injection.

Table S2: Mass spectrometry conditions

| Mycotoxin | Molecular Formula                                 | RT/min | MRM (m/z)    | Declustering Potential(DP) | Collision Energy(CE) |
|-----------|---------------------------------------------------|--------|--------------|----------------------------|----------------------|
| OTA       | C <sub>20</sub> H <sub>18</sub> ClNO <sub>6</sub> | 8.28   | 404.2/239.2* | 120                        | 33                   |
|           |                                                   |        | 404.2/358.3  | 150                        | 18.7                 |
| OTα       | C <sub>11</sub> H <sub>9</sub> ClO <sub>5</sub>   | 6.13   | 255.1/167.0* | -55                        | -33                  |
|           |                                                   |        | 255.1/211.0  | -36                        | -21                  |

\*Transitions used for quantification.
